# Supplementary material for: Beyond a reference genome: pangenomes and population genomics of underutilized and orphan crops for future food and nutrition security
Source: PubMed Central journal article supplement (PMC9994440; doi:10.1111/nph.18021), 2022-03-22
Supplement: NPH-234-1583-s001.pdf [file NPH-234-1583-s001.pdf]

## ***New Phytologist* Supporting Information**

Article title: **Beyond a reference genome: pangenomes and population genomics of underutilised and orphan crops for future food and nutrition security**

Authors: **Mark A. Chapman, Yuqi He and Meiliang Zhou**

Article acceptance date: 22 January 2022

The following Supporting Information is available for this article:

**Table S1. List of important traits dissected by GWAS in rice**

**Table S2. List of important traits dissected by GWAS in maize**

**Table S1. List of important traits dissected by GWAS in rice**

| Reference           | Population                | Loci associated with traits                                                                                                                                                                                                                                                                                                                                                                                                                                                                                                                                                                               |
|---------------------|---------------------------|-----------------------------------------------------------------------------------------------------------------------------------------------------------------------------------------------------------------------------------------------------------------------------------------------------------------------------------------------------------------------------------------------------------------------------------------------------------------------------------------------------------------------------------------------------------------------------------------------------------|
| Huang et al. 2010   | 373 indica accessions     | 3 loci associated with tiller number, 2 loci associated with grain width, 5 loci associated with grain length, 2 loci associated with spikelet number, 1 locus associated with gelatinization temperature, 3 loci associated with amylose content, 2 loci associated with apiculus color, 3 loci associated with pericarp color, 2 loci associated with 2 hull color, 7 loci associated with heading date, 4 loci associated with drought tolerance, 3 loci associated with seed shattering degree                                                                                                        |
| Huang et al. 2012   | 950 rice accessions       | 2 loci associated with gelatinization temperature, 1 locus associated with hull color, 5 loci associated with grain length, 1 locus associated with grain number, 4 loci associated with grain width, 16 loci associated with heading date, 4 loci associated with amylose content, 4 associated with pericarp color, 3 associated with protein content, 4 associated with grain weight, 1 associated with apiculus color                                                                                                                                                                                 |
| Chen et al. 2014    | 529 rice accessions       | 634 loci associated with 598 leave metabolites                                                                                                                                                                                                                                                                                                                                                                                                                                                                                                                                                            |
| Yang et al. 2014b   | 529 accession             | 5 loci associated with shoot fresh weight, 3 loci associated with shoot dry weight, 22 loci associated with plant height, 1 locus associated with tillers number, 7 loci associated with green leaves area, 11 loci associated with plant compactness, 11 loci associated with grain weight, 1 locus associated with filled spikelets number, 1 locus associated with grain fertility, 21 loci associated with grain length, 10 loci associated with grain length/width ratio, 28 loci associated with grain projected area, 19 loci associated with grain width, 1 locus associated with yield per plant |
| Wang et al. 2015    | 529 accession             | 46 loci associated with chlorophyll content                                                                                                                                                                                                                                                                                                                                                                                                                                                                                                                                                               |
| Chen et al. 2016    | 502 rice accessions       | 476 loci associated with 331 grain metabolites                                                                                                                                                                                                                                                                                                                                                                                                                                                                                                                                                            |
| Crowell et al. 2016 | 242 accessions            | 489 loci associated with 49 panicle traits                                                                                                                                                                                                                                                                                                                                                                                                                                                                                                                                                                |
| Meyer et al. 2016   | 93 African rice landraces | 11 loci associated with salt tolerance                                                                                                                                                                                                                                                                                                                                                                                                                                                                                                                                                                    |
| Si et al. 2016      | 381 japonica varieties    | 1 locus associated with grain length                                                                                                                                                                                                                                                                                                                                                                                                                                                                                                                                                                      |
| Wang et al. 2016a   | 203 accessions            | 1 locus associated with grain length, 1 locus associated with amylose content in rice kernels, 2 loci associated with pericarp color                                                                                                                                                                                                                                                                                                                                                                                                                                                                      |
| Yano et al. 2016    | 176 japonica varieties    | 12 loci associated with spikelet number, 1 locus associated with panicle number per plant, 5 loci associated with heading date, 3 loci associated with panicle length, 47 loci associated with plant height, 9 loci associated with leaf blade width, 50 loci associated with awn length                                                                                                                                                                                                                                                                                                                  |
| Duan et al. 2017    | 102 indica varieties      | 3 loci associated with grain width                                                                                                                                                                                                                                                                                                                                                                                                                                                                                                                                                                        |
| Gong et al. 2017    | 10084 F2 lines            | 12 loci associated with grain length-to-width ratio, 11 loci associated with chalky grain rate                                                                                                                                                                                                                                                                                                                                                                                                                                                                                                            |
| Zhou et al. 2017    | 533 accessions            | 23 loci associated with stigma exertion and related floral traits                                                                                                                                                                                                                                                                                                                                                                                                                                                                                                                                         |
| Dong et al. 2018    | 529 rice accessions       | 62 loci associated with flag leaf angle                                                                                                                                                                                                                                                                                                                                                                                                                                                                                                                                                                   |
| Guo et al. 2018     | 507 rice accessions       | 470 loci associated with drought resistance                                                                                                                                                                                                                                                                                                                                                                                                                                                                                                                                                               |
| Sun et al. 2018     | 510 accessions            | 3 loci associated with mesocotyl length                                                                                                                                                                                                                                                                                                                                                                                                                                                                                                                                                                   |
| Xiao et al. 2018    | 1,033 accessions          | 5 loci associated with cold tolerance at the booting stage, 8 loci associated with cold tolerance at the seedling stage                                                                                                                                                                                                                                                                                                                                                                                                                                                                                   |

|                   |                     |                                                                                                                                                            |
|-------------------|---------------------|------------------------------------------------------------------------------------------------------------------------------------------------------------|
| Liu et al. 2019   | 208 rice accessions | 16 loci associated with mesocotyl length                                                                                                                   |
| Ma et al. 2019    | 270 rice accessions | 5 loci associated with grain length, 4 loci associated with grain width                                                                                    |
| Tang et al. 2019  | 117 rice accessions | 2 loci associated with nitrogen use efficiency                                                                                                             |
| Yan et al. 2019   | 127 rice cultivars  | 12 loci associated with grain Cd accumulation                                                                                                              |
| Zhang et al. 2019 | 510 accessions      | 33 loci associated with callus induction rate, 31 loci associated with callus induction speed, 24 loci associated with time of the first callus appearance |
| Liu et al. 2020   | 584 rice accessions | 27 loci associated with rice blast resistance                                                                                                              |
| Neang et al. 2020 | 296 accessions      | 1 locus associated with salt removal in leaf sheaths                                                                                                       |
| Yuan et al. 2020  | 664 rice accessions | 21 loci associated with salt tolerance                                                                                                                     |
| Zhang et al. 2020 | 137 rice accessions | 2 loci associated with maximum root length, 2 loci associated with total root weight                                                                       |
| Liu et al. 2021   | 110 rice accessions | 1 locus associated with tillering response to nitrogen                                                                                                     |

**Table S2. List of important traits dissected by GWAS in maize**

| Reference                    | Population                               | Loci associated with traits                                                                                                                                                                                 |
|------------------------------|------------------------------------------|-------------------------------------------------------------------------------------------------------------------------------------------------------------------------------------------------------------|
| Buckler et al. 2009          | 5000 NAM population                      | 333 loci associated with flowering time                                                                                                                                                                     |
| Tian et al. 2011             | 4892 NAM population                      | 36 loci associated with leaf length, 34 loci associated with leaf width, 30 loci associated with upper leaf angle                                                                                           |
| Poland et al. 2011           | 5000 NAM population                      | 29 loci associated with northern leaf blight resistance                                                                                                                                                     |
| Kump et al. 2011             | 5000 NAM population                      | 32 loci associated with southern leaf blight resistance                                                                                                                                                     |
| Jiao et al. 2012             | 278 inbred lines                         | 5 loci associated with silk color, 5 loci associated with days to anthesis, 5 loci associated with cob color                                                                                                |
| Cook et al. 2012             | 4699 NAM population and 282 inbred lines | 21 loci associated with starch content, 26 loci associated with protein content, 22 loci associated with oil content                                                                                        |
| Li et al. 2013               | 368 inbred lines                         | 74 loci associated with oil concentration or composition                                                                                                                                                    |
| Strigens et al. 2013         | 375 inbred lines                         | 19 loci associated with chilling tolerance                                                                                                                                                                  |
| Yang et al. 2013             | 368 inbred lines                         | 48 loci associated with flowering time                                                                                                                                                                      |
| Wen et al. 2014              | 368 inbred lines                         | 1256 loci associated with 501 metabolites in maize kernel                                                                                                                                                   |
| Olukolu et al. 2014          | 3381 NAM population                      | 44 loci associated with hypersensitive defense response                                                                                                                                                     |
| Thirunavukkarasu et al. 2014 | 240 inbred lines                         | 28 loci associated with stomatal closure, 15 loci associated with flowering, 5 loci associated with root development, 4 loci associated with detoxification, 2 loci associated with reduced water potential |
| Yang et al. 2014a            | 513 inbred lines                         | 6 loci associated with ear length, 2 loci associated with tassel main axis length, 1 locus associated with plant height, 1 locus associated with kernel width, 1 locus associated with ear leaf width       |
| Benke et al. 2015            | 267 inbred lines                         | 35 loci associated with iron homeostasis                                                                                                                                                                    |
| Dell'Acqua et al. 2015       | 529 inbred lines                         | 3 loci associated with grain yield and 3 loci associated with flowering time                                                                                                                                |
| Leiboff et al. 2015          | 384 inbred lines                         | 51 loci associated with shoot apical meristem volume                                                                                                                                                        |
| Mao et al. 2015              | 368 inbred lines                         | 1 locus associated with drought tolerance                                                                                                                                                                   |
| Mammadov et al. 2015         | 300 inbred lines                         | 4 loci associated with gray leaf spot resistance                                                                                                                                                            |
| Cui et al. 2016              | 508 inbred lines                         | 5 loci associated with hush number, 1 locus associated with hush width, 3 loci associated with hush thickness                                                                                               |
| Li et al. 2016               | 258 inbred lines                         | 21 loci associated with plant height; 20 loci associated with ear height                                                                                                                                    |
| Wang et al. 2016b            | 368 inbred lines                         | 37 loci associated with drought tolerance                                                                                                                                                                   |
| Liu et al. 2016              | 263 inbred lines                         | 4 loci associated with starch content in maize kernels                                                                                                                                                      |
| Adewale et al. 2020          | 132 inbred lines                         | 11 loci associated with Striga resistance                                                                                                                                                                   |

## Literature Cited in Tables S1 and S2

- Adewale SA, Badu-Apraku B, Akinwale RO, Paterne AA, Gedil M, Garcia-Oliveira AL. 2020.** Genome-wide association study of Striga resistance in early maturing white tropical maize inbred lines. *BMC Plant Biology* **20**(1): 203.
- Benke A, Urbany C, Stich B. 2015.** Genome-wide association mapping of iron homeostasis in the maize association population. *BMC Genetics* **16**: 1.
- Buckler ES, Holland JB, Bradbury PJ, Acharya CB, Brown PJ, Browne C, Ersoz E, Flint-Garcia S, Garcia A, Glaubitz JC, et al. 2009.** The Genetic Architecture of Maize Flowering Time. *Science* **325**(5941): 714-718.
- Chen W, Gao Y, Xie W, Gong L, Lu K, Wang W, Li Y, Liu X, Zhang H, Dong H, et al. 2014.** Genome-wide association analyses provide genetic and biochemical insights into natural variation in rice metabolism. *Nature Genetics* **46**(7): 714-721.
- Chen W, Wang W, Peng M, Gong L, Gao Y, Wan J, Wang S, Shi L, Zhou B, Li Z, et al. 2016.** Comparative and parallel genome-wide association studies for metabolic and agronomic traits in cereals. *Nat Commun* **7**: 12767.
- Cook JP, McMullen MD, Holland JB, Tian F, Bradbury P, Ross-Ibarra J, Buckler ES, Flint-Garcia SA. 2012.** Genetic architecture of maize kernel composition in the nested association mapping and inbred association panels. *Plant Physiology* **158**(2): 824-834.
- Crowell S, Korniliev P, Falcão A, Ismail A, Gregorio G, Mezey J, McCouch S. 2016.** Genome-wide association and high-resolution phenotyping link *Oryza sativa* panicle traits to numerous trait-specific QTL clusters. *Nat Commun* **7**: 10527.
- Cui Z, Luo J, Qi C, Ruan Y, Li J, Zhang A, Yang X, He Y. 2016.** Genome-wide association study (GWAS) reveals the genetic architecture of four husk traits in maize. *BMC Genomics* **17**(1): 946.
- Dell'Acqua M, Gatti DM, Pea G, Cattonaro F, Coppens F, Magris G, Hlaing AL, Aung HH, Nelissen H, Baute J, et al. 2015.** Genetic properties of the MAGIC maize population: a new platform for high definition QTL mapping in *Zea mays*. *Genome Biology* **16**(1): 167.
- Dong H, Zhao H, Li S, Han Z, Hu G, Liu C, Yang G, Wang G, Xie W, Xing Y. 2018.** Genome-wide association studies reveal that members of bHLH subfamily 16 share a conserved function in regulating flag leaf angle in rice (*Oryza sativa*). *PLoS Genetics* **14**(4): e1007323.
- Duan P, Xu J, Zeng D, Zhang B, Geng M, Zhang G, Huang K, Huang L, Xu R, Ge S, et al. 2017.** Natural Variation in the Promoter of GSE5 Contributes to Grain Size Diversity in Rice. *Molecular Plant* **10**(5): 685-694.
- Gong J, Miao J, Zhao Y, Zhao Q, Feng Q, Zhan Q, Cheng B, Xia J, Huang X, Yang S, et al. 2017.** Dissecting the Genetic Basis of Grain Shape and Chalkiness Traits in Hybrid Rice Using Multiple Collaborative Populations. *Molecular Plant* **10**(10): 1353-1356.
- Guo Z, Yang W, Chang Y, Ma X, Tu H, Xiong F, Jiang N, Feng H, Huang C, Yang P, et al. 2018.** Genome-Wide Association Studies of Image Traits Reveal Genetic Architecture of Drought Resistance in Rice. *Molecular Plant* **11**(6): 789-805.
- Huang X, Kurata N, Wei X, Wang ZX, Wang A, Zhao Q, Zhao Y, Liu K, Lu H, Li W, et al. 2012.** A map of rice genome variation reveals the origin of cultivated rice. *Nature* **490**(7421): 497-501.
- Huang X, Wei X, Sang T, Zhao Q, Feng Q, Zhao Y, Li C, Zhu C, Lu T, Zhang Z, et al. 2010.** Genome-wide association studies of 14 agronomic traits in rice landraces. *Nature Genetics* **42**(11): 961-967.
- Jiao Y, Zhao H, Ren L, Song W, Zeng B, Guo J, Wang B, Liu Z, Chen J, Li W, et al. 2012.** Genome-wide genetic changes during modern breeding of maize. *Nature Genetics* **44**(7): 812-815.
- Kump KL, Bradbury PJ, Wissler RJ, Buckler ES, Belcher AR, Oropeza-Rosas MA, Zwonitzer JC, Kresovich S, McMullen MD, Ware D, et al. 2011.** Genome-wide association study of quantitative resistance to southern leaf blight in the maize nested association mapping population. *Nature Genetics* **43**(2): 163-168.
- Leiboff S, Li X, Hu HC, Todt N, Yang J, Li X, Yu X, Muehlbauer GJ, Timmermans MC, Yu J, et al. 2015.** Genetic control of morphometric diversity in the maize shoot apical meristem. *Nat Commun* **6**: 8974.
- Li H, Peng Z, Yang X, Wang W, Fu J, Wang J, Han Y, Chai Y, Guo T, Yang N, et al. 2013.** Genome-wide association study

- dissects the genetic architecture of oil biosynthesis in maize kernels. *Nature Genetics* **45**(1): 43-50.
- Li X, Zhou Z, Ding J, Wu Y, Zhou B, Wang R, Ma J, Wang S, Zhang X, Xia Z, et al. 2016.** Combined Linkage and Association Mapping Reveals QTL and Candidate Genes for Plant and Ear Height in Maize. *Frontiers in Plant Science* **7**: 833.
- Liu H, Zhan J, Li J, Lu X, Liu J, Wang Y, Zhao Q, Ye G. 2019.** Genome-wide Association Study (GWAS) for Mesocotyl Elongation in Rice (*Oryza sativa* L.) under Multiple Culture Conditions. *Genes (Basel)* **11**(1): 49.
- Liu MH, Kang H, Xu Y, Peng Y, Wang D, Gao L, Wang X, Ning Y, Wu J, Liu W, et al. 2020.** Genome-wide association study identifies an NLR gene that confers partial resistance to *Magnaporthe oryzae* in rice. *Plant Biotechnology Journal* **18**(6): 1376-1383.
- Liu N, Xue Y, Guo Z, Li W, Tang J. 2016.** Genome-Wide Association Study Identifies Candidate Genes for Starch Content Regulation in Maize Kernels. *Frontiers in Plant Science* **7**: 1046.
- Liu Y, Wang H, Jiang Z, Wang W, Xu R, Wang Q, Zhang Z, Li A, Liang Y, Ou S, et al. 2021.** Genomic basis of geographical adaptation to soil nitrogen in rice. *Nature* **590**(7847): 600-605.
- Ma X, Feng F, Zhang Y, Elesawi IE, Xu K, Li T, Mei H, Liu H, Gao N, Chen C, et al. 2019.** A novel rice grain size gene OsSNB was identified by genome-wide association study in natural population. *PLoS Genetics* **15**(5): e1008191.
- Mammadov J, Sun X, Gao Y, Ochsenfeld C, Bakker E, Ren R, Flora J, Wang X, Kumpatla S, Meyer D, et al. 2015.** Combining powers of linkage and association mapping for precise dissection of QTL controlling resistance to gray leaf spot disease in maize (*Zea mays* L.). *BMC Genomics* **16**: 916.
- Mao H, Wang H, Liu S, Li Z, Yang X, Yan J, Li J, Tran LS, Qin F. 2015.** A transposable element in a NAC gene is associated with drought tolerance in maize seedlings. *Nat Commun* **6**: 8326.
- Meyer RS, Choi JY, Sanches M, Plessis A, Flowers JM, Amas J, Dorph K, Barretto A, Gross B, Fuller DQ, et al. 2016.** Domestication history and geographical adaptation inferred from a SNP map of African rice. *Nature Genetics* **48**(9): 1083-1088.
- Neang S, de Ocampo M, Egdane JA, Platten JD, Ismail AM, Seki M, Suzuki Y, Skoulding NS, Kano-Nakata M, Yamauchi A, et al. 2020.** A GWAS approach to find SNPs associated with salt removal in rice leaf sheath. *Annals of Botany* **126**(7): 1193-1202.
- Olukolu BA, Wang GF, Vontimitta V, Venkata BP, Marla S, Ji J, Gachomo E, Chu K, Negeri A, Benson J, et al. 2014.** A genome-wide association study of the maize hypersensitive defense response identifies genes that cluster in related pathways. *PLoS Genetics* **10**(8): e1004562.
- Poland JA, Bradbury PJ, Buckler ES, Nelson RJ. 2011.** Genome-wide nested association mapping of quantitative resistance to northern leaf blight in maize. *Proc Natl Acad Sci U S A* **108**(17): 6893-6898.
- Si L, Chen J, Huang X, Gong H, Luo J, Hou Q, Zhou T, Lu T, Zhu J, Shangguan Y, et al. 2016.** *OsSPL13* controls grain size in cultivated rice. *Nature Genetics* **48**(4): 447-456.
- Strigens A, Freitag NM, Gilbert X, Grieder C, Riedelsheimer C, Schrag TA, Messmer R, Melchinger AE. 2013.** Association mapping for chilling tolerance in elite flint and dent maize inbred lines evaluated in growth chamber and field experiments. *Plant Cell Environ* **36**(10): 1871-1887.
- Sun S, Wang T, Wang L, Li X, Jia Y, Liu C, Huang X, Xie W, Wang X. 2018.** Natural selection of a GSK3 determines rice mesocotyl domestication by coordinating strigolactone and brassinosteroid signaling. *Nat Commun* **9**(1): 2523.
- Tang W, Ye J, Yao X, Zhao P, Xuan W, Tian Y, Zhang Y, Xu S, An H, Chen G, et al. 2019.** Genome-wide associated study identifies NAC42-activated nitrate transporter conferring high nitrogen use efficiency in rice. *Nat Commun* **10**(1): 5279.
- Thirunavukkarasu N, Hossain F, Arora K, Sharma R, Shiriga K, Mittal S, Mohan S, Namratha PM, Dogga S, Rani TS, et al. 2014.** Functional mechanisms of drought tolerance in subtropical maize (*Zea mays* L.) identified using genome-wide association mapping. *BMC Genomics* **15**(1): 1182.

- Tian F, Bradbury PJ, Brown PJ, Hung H, Sun Q, Flint-Garcia S, Rocheford TR, McMullen MD, Holland JB, Buckler ES. 2011.** Genome-wide association study of leaf architecture in the maize nested association mapping population. *Nature Genetics* **43**(2): 159-162.
- Wang H, Xu X, Vieira FG, Xiao Y, Li Z, Wang J, Nielsen R, Chu C. 2016.** The Power of Inbreeding: NGS-Based GWAS of Rice Reveals Convergent Evolution during Rice Domestication. *Molecular Plant* **9**(7): 975-985.
- Wang Q, Xie W, Xing H, Yan J, Meng X, Li X, Fu X, Xu J, Lian X, Yu S, et al. 2015.** Genetic Architecture of Natural Variation in Rice Chlorophyll Content Revealed by a Genome-Wide Association Study. *Molecular Plant* **8**(6): 946-957.
- Wang X, Wang H, Liu S, Ferjani A, Li J, Yan J, Yang X, Qin F. 2016.** Genetic variation in *ZmVPP1* contributes to drought tolerance in maize seedlings. *Nature Genetics* **48**(10): 1233-1241.
- Wen W, Li D, Li X, Gao Y, Li W, Li H, Liu J, Liu H, Chen W, Luo J, et al. 2014.** Metabolome-based genome-wide association study of maize kernel leads to novel biochemical insights. *Nat Commun* **5**: 3438.
- Xiao N, Gao Y, Qian H, Gao Q, Wu Y, Zhang D, Zhang X, Yu L, Li Y, Pan C, et al. 2018.** Identification of Genes Related to Cold Tolerance and a Functional Allele That Confers Cold Tolerance. *Plant Physiology* **177**(3): 1108-1123.
- Yan H, Xu W, Xie J, Gao Y, Wu L, Sun L, Feng L, Chen X, Zhang T, Dai C, et al. 2019.** Variation of a major facilitator superfamily gene contributes to differential cadmium accumulation between rice subspecies. *Nat Commun* **10**(1): 2562.
- Yang N, Lu Y, Yang X, Huang J, Zhou Y, Ali F, Wen W, Liu J, Li J, Yan J. 2014.** Genome wide association studies using a new nonparametric model reveal the genetic architecture of 17 agronomic traits in an enlarged maize association panel. *PLoS Genetics* **10**(9): e1004573.
- Yang Q, Li Z, Li W, Ku L, Wang C, Ye J, Li K, Yang N, Li Y, Zhong T, et al. 2013.** CACTA-like transposable element in *ZmCCT* attenuated photoperiod sensitivity and accelerated the postdomestication spread of maize. *Proceedings of the National Academy of Sciences of the United States of America* **110**(42): 16969-16974.
- Yang W, Guo Z, Huang C, Duan L, Chen G, Jiang N, Fang W, Feng H, Xie W, Lian X, et al. 2014.** Combining high-throughput phenotyping and genome-wide association studies to reveal natural genetic variation in rice. *Nat Commun* **5**: 5087.
- Yano K, Yamamoto E, Aya K, Takeuchi H, Lo PC, Hu L, Yamasaki M, Yoshida S, Kitano H, Hirano K, et al. 2016.** Genome-wide association study using whole-genome sequencing rapidly identifies new genes influencing agronomic traits in rice. *Nature Genetics* **48**(8): 927-934.
- Yuan J, Wang X, Zhao Y, Khan NU, Zhao Z, Zhang Y, Wen X, Tang F, Wang F, Li Z. 2020.** Genetic basis and identification of candidate genes for salt tolerance in rice by GWAS. *Sci Rep* **10**(1): 9958.
- Zhang H, San ML, Jang SG, Lee JH, Kim NE, Lee AR, Park SY, Cao FY, Chin JH, Kwon SW. 2020.** Genome-Wide Association Study of Root System Development at Seedling Stage in Rice. *Genes (Basel)* **11**(12): 1395.
- Zhang Z, Zhao H, Li W, Wu J, Zhou Z, Zhou F, Chen H, Lin Y. 2019.** Genome-wide association study of callus induction variation to explore the callus formation mechanism of rice. *J Integr Plant Biol* **61**(11): 1134-1150.
- Zhou H, Li P, Xie W, Hussain S, Li Y, Xia D, Zhao H, Sun S, Chen J, Ye H, et al. 2017.** Genome-wide Association Analyses Reveal the Genetic Basis of Stigma Exsertion in Rice. *Molecular Plant* **10**(4): 634-644.
